# Supplementary material for: Efficiency of the immunome protein interaction network increases during evolution
Source: PubMed Central journal article supplement (PMC2373292; doi:10.1186/1745-7580-4-4), 2008-04-22

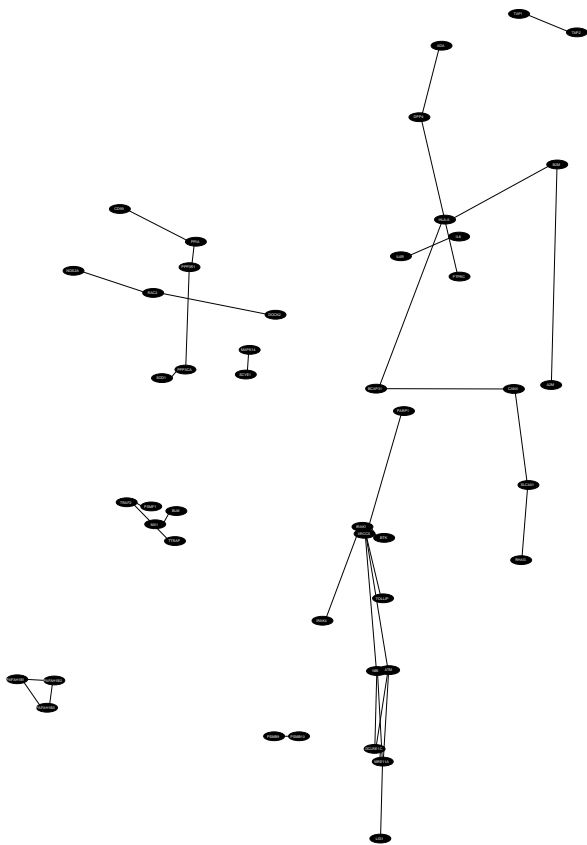

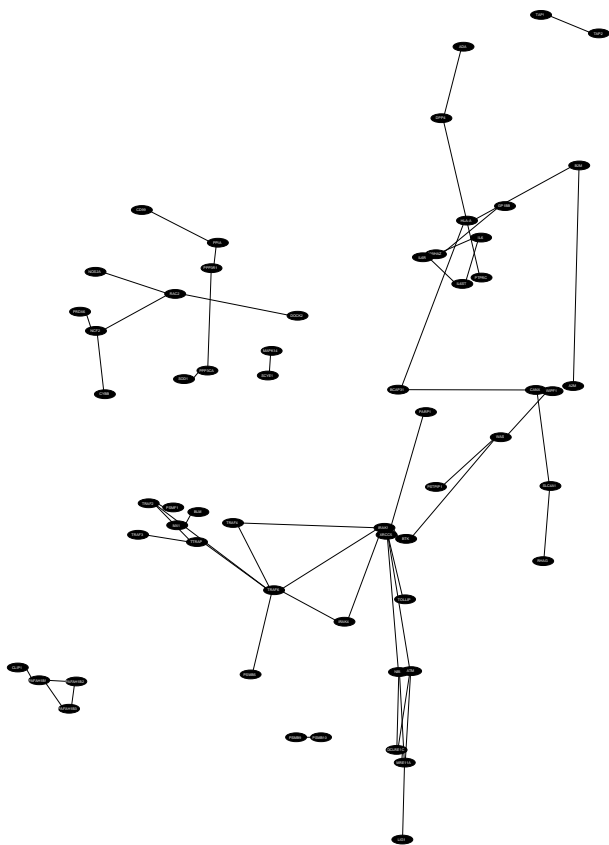

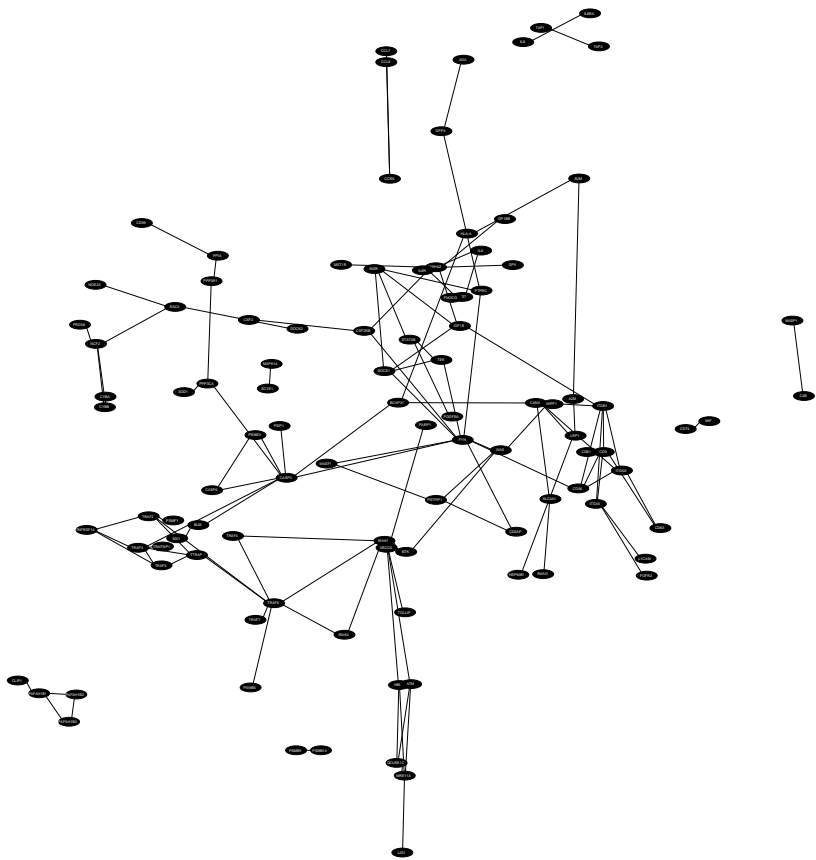

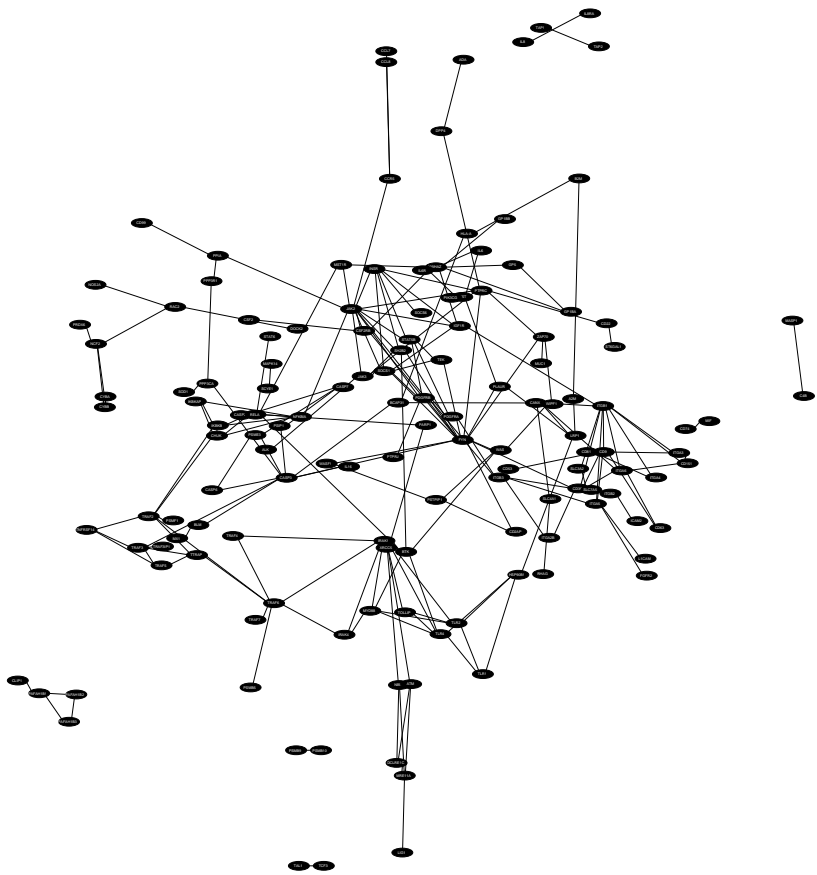

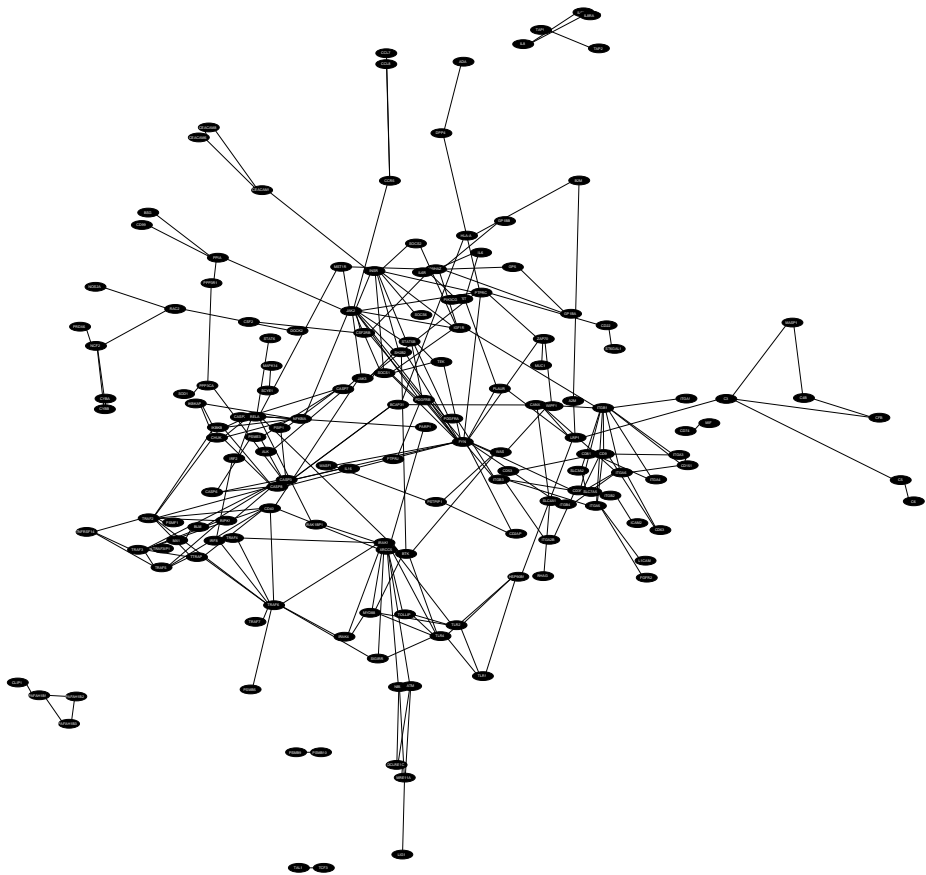

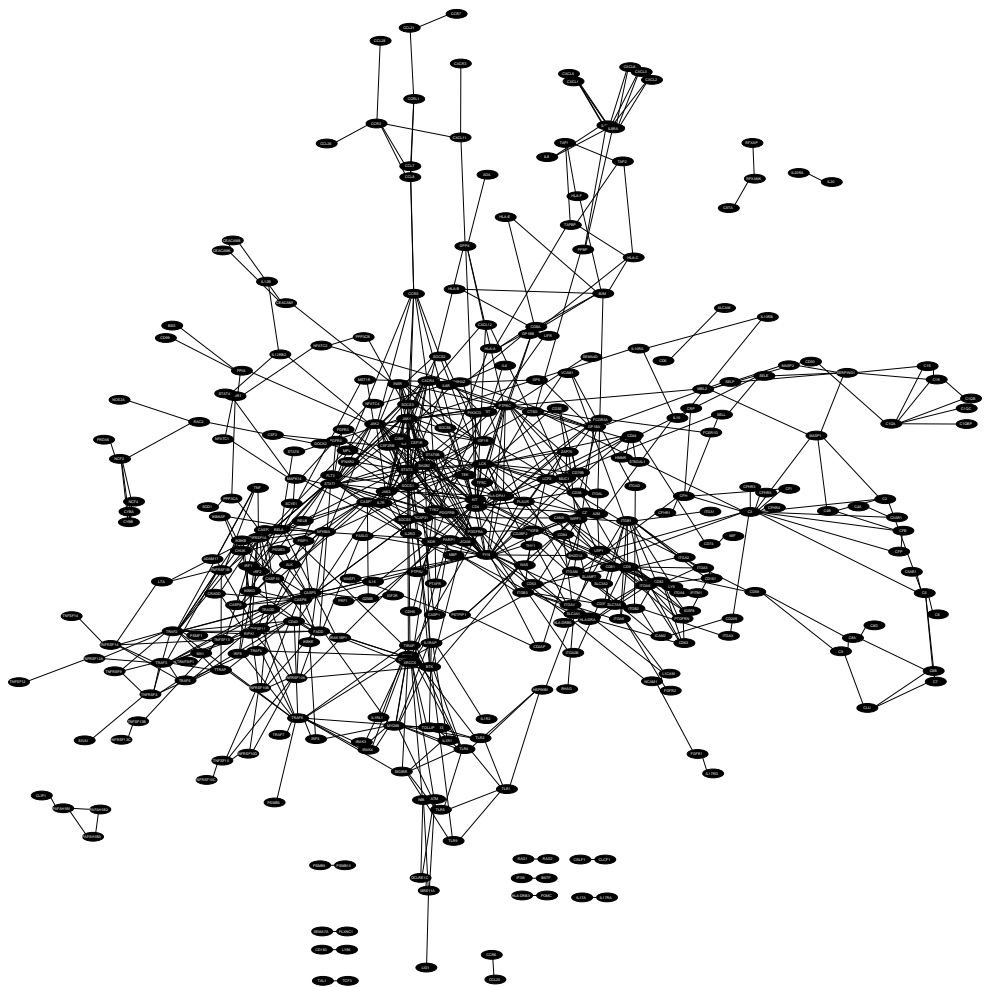

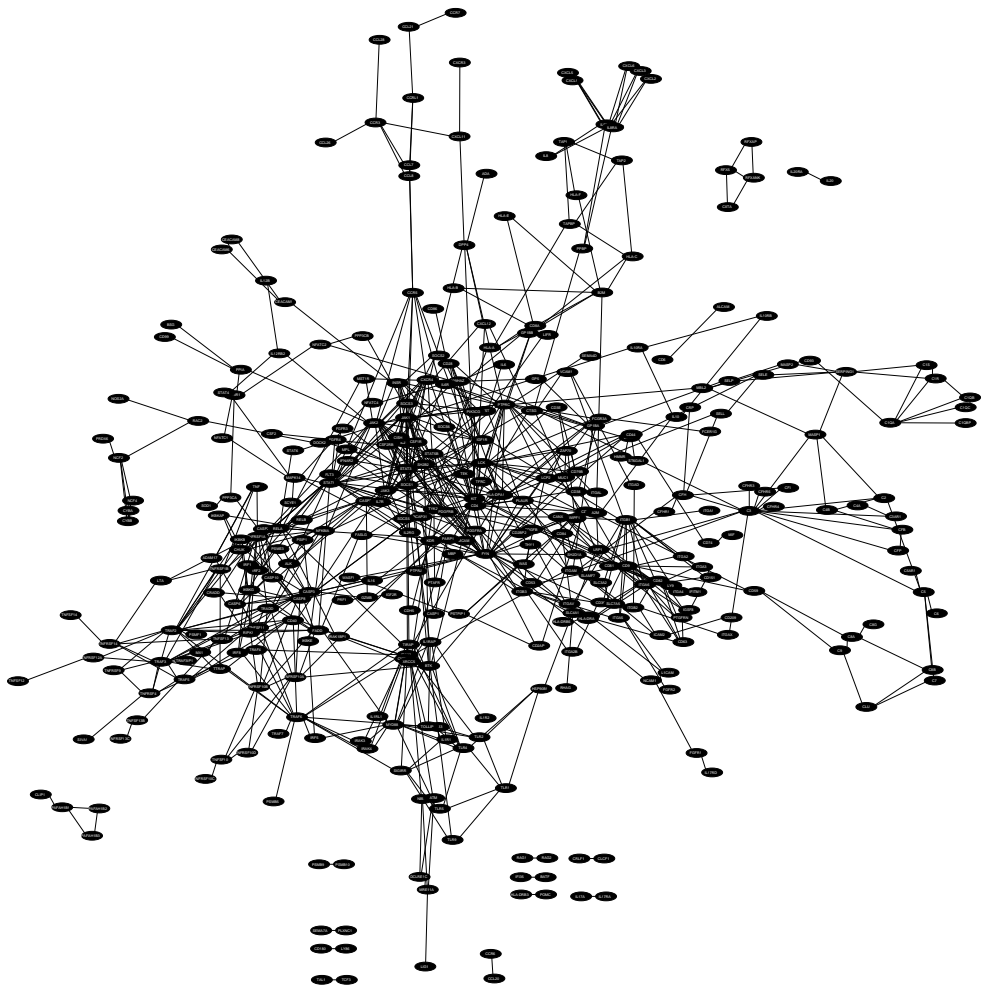

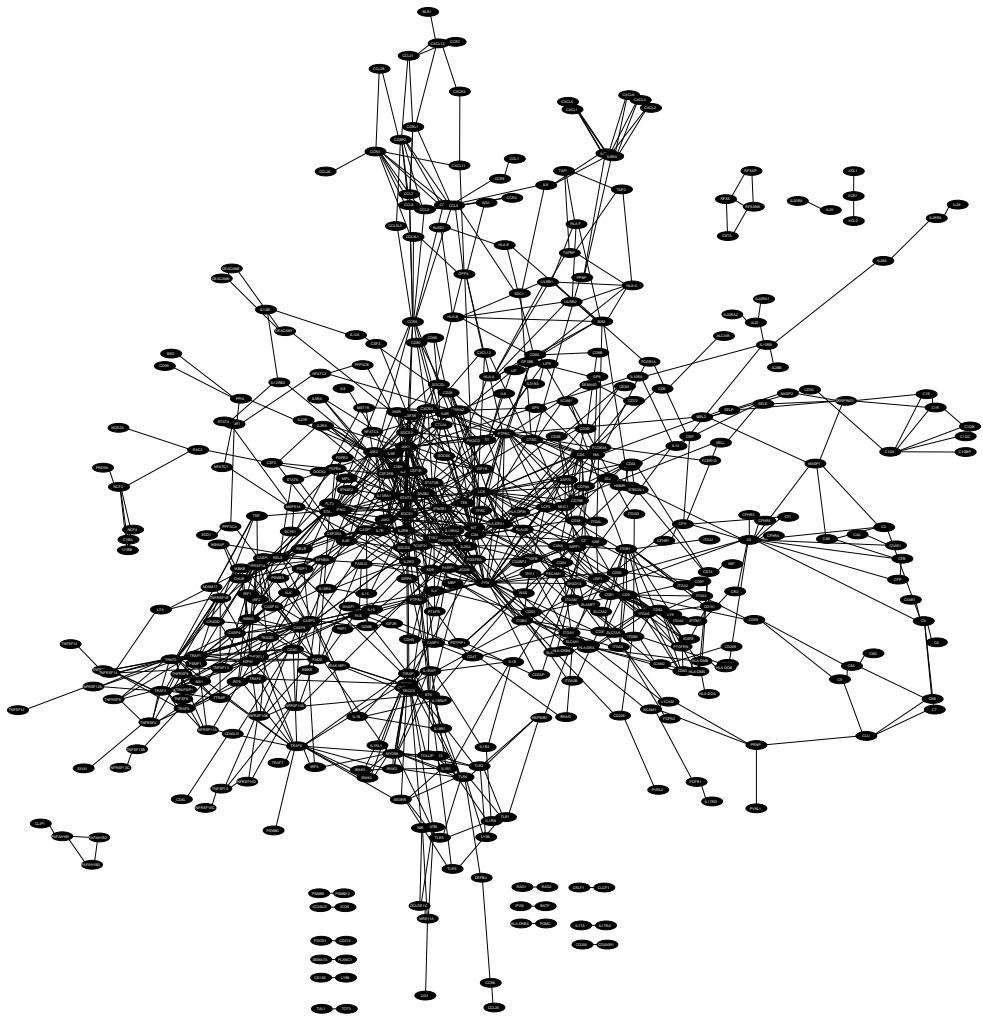



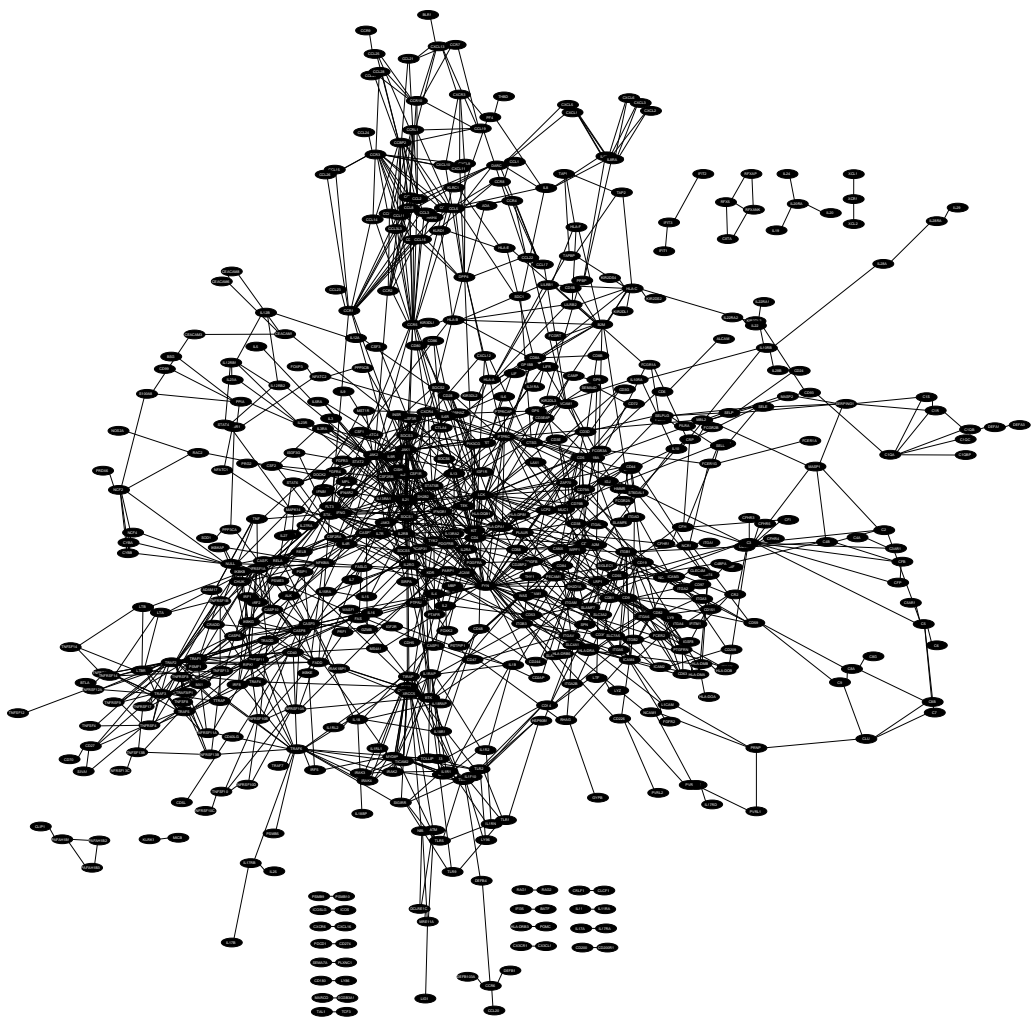

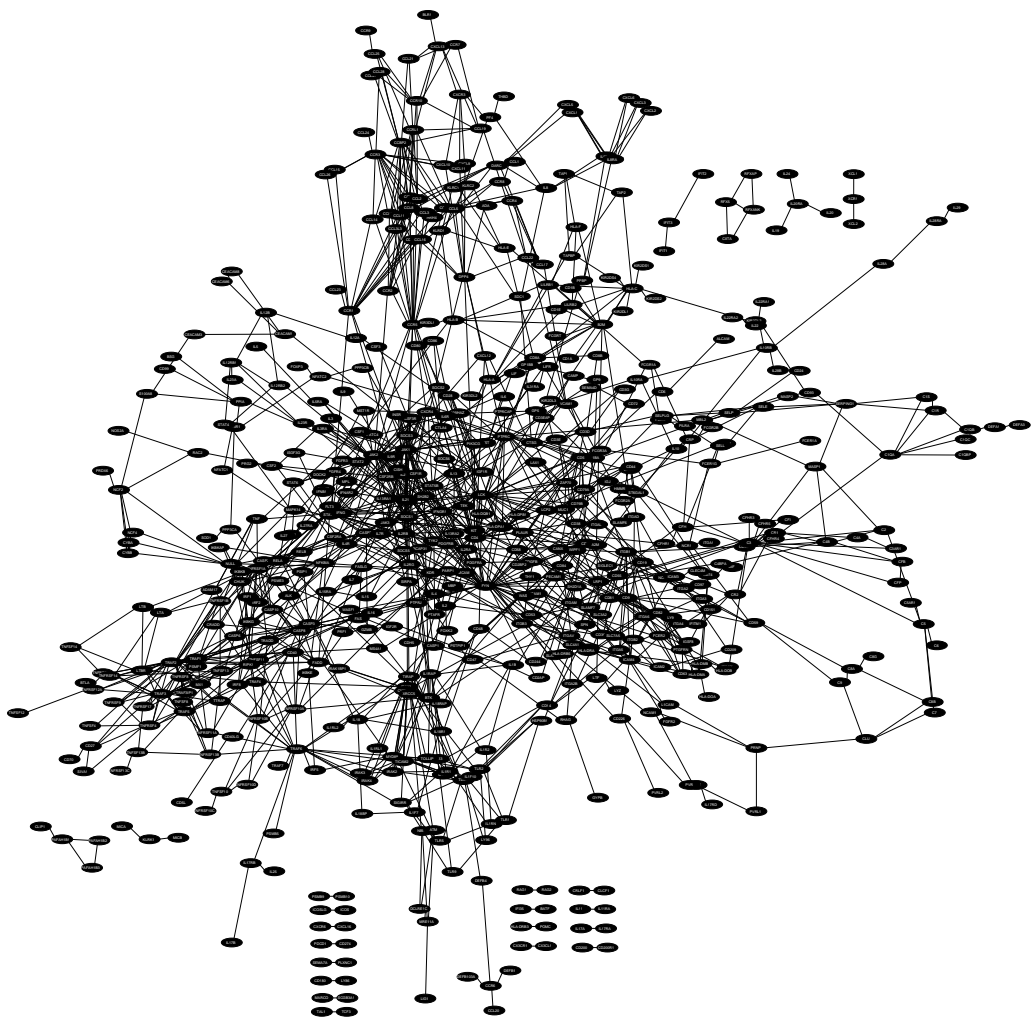

Supplement: 1745-7580-4-4-S2.pdf [file 1745-7580-4-4-S2.pdf]
